# Supplementary material
Source: HighWire-hosted journal article supplement (https://bmjopen.bmj.com/content/10/1/e032096)
Supplement: inline-supplementary-material-2 [file inline-supplementary-material-2.pdf]

## Medline

## Search strategy

1. randomized control trial.pt. (4,366,033)
2. controlled clinical trial.pt. (92,859)
3. random\$.ti.ab. (243,513)
4. placebo.ti.ab. (200,860)
5. clinical trials as topic.mj. (32,507)
6. trial.ti.ab (901,271)
7. or/1-6 (1,300,135)
8. NOT (animals/ not humans/) (6,658,452)
9. 7 not 8 (1,117,817)
10. Movement disorder.ti.ab. (16,284)
11. Tremor.ti.ab. (20,602)
12. Essential tremor.ti.ab (3,586)
13. Or/10-11 (34,889)
14. Essential tremor.ti.ab. (3,586)
15. Essential tremor.sh. (1,802)
16. Essential tremor\*.ti.ab.(3,587)
17. Benign essential tremor\*.ti.ab.(57)
18. Familial tremor\*.ti.ab.(194)
19. Hereditary essential tremor\*.ti.ab.(39 )
20. Or/14-19 (3,838)
21. Therapy.ab.ti (1,788,096)
22. Therapy.sh. (4,069,919)
23. Propranolol.ti.ab. (31,975)
24. Propranolol hydrochloride.ti.ab. (623)
25. Or/21-24 (4,856,447)
26. and 9 and 13 and 20 and 25 (223)
